# Supplementary material for: Development and characterization of an ice-selecting pumped counterflow virtual impactor (IS-PCVI) to study ice crystal residuals
Source: Copernicus journal article supplement (doi:10.5194/amt-2016-102), 2016-04-22
Supplement: Supplementary file 1 [file amt-2016-102-supplement.pdf]

# Development and characterization of an ice-selecting pumped counterflow virtual impactor (IS-PCVI) to study ice crystal residuals

Naruki Hiranuma<sup>1</sup>, Ottmar Möhler<sup>1</sup>, Gourihar Kulkarni<sup>2</sup>, Martin Schnaiter<sup>1</sup>, Steffen Vogt<sup>1</sup>, Paul Vochezer<sup>1</sup>, Emma Järvinen<sup>1</sup>, Robert Wagner<sup>1</sup>, David M. Bell<sup>2</sup>, Jacqueline Wilson<sup>2</sup>, Alla Zelenyuk<sup>2</sup>, and  
5 Daniel J. Cziczo<sup>3</sup>

<sup>1</sup>Institute for Meteorology and Climate Research – Atmospheric Aerosol Research, Karlsruhe Institute of Technology, Karlsruhe, Germany.

<sup>2</sup>Pacific Northwest National Laboratory, Richland, WA, USA.

10 <sup>3</sup>Earth, Atmospheric and Planetary Sciences, Civil and Environmental Engineering, Massachusetts Institute of Technology, Cambridge, MA, USA.

*Correspondence to:* Naruki Hiranuma (seong.moon@kit.edu)

## Supplementary information

15 Aerosol types and associated particle generators used in this work are summarized in Table S1. Detailed characteristics of IS-PCVI properties are summarized in Table S2. During INUIT05, the output flow was fixed at 2 lpm. Contrarily, the output flow was varied from 2.5 to 6 lpm in the FIN01 measurements listed in the table, depending on the flow requirements of the instruments deployed downstream of IS-PCVI. Note that varying the output flow only influences a concentration enhancement factor (Sect. 3.3) and does not affect the cut-size (Sect. 4.4). Other information regarding particle properties  
20 (i.e., concentration and size distribution of aerosol, droplet and/or ice) before and during individual AIDA expansion experiments are available upon request (contact: Naruki Hiranuma, seong.moon@kit.edu). Temporal profiles of the AIDA cloud simulation experiments (as illustrated in Fig. 6) can also be provided.

**Table S1.** List of aerosol types and particle generation techniques.

| Aerosol type                                                  | Generator                                            | Exp. ID                              | Reference                                                  |
|---------------------------------------------------------------|------------------------------------------------------|--------------------------------------|------------------------------------------------------------|
| Ammonium sulfate                                              | Custom-made atomizer                                 | INUIT05_29-37                        | -                                                          |
| Sodium chloride                                               | Custom-made atomizer                                 | INUIT05_51, 55-58, 60-64             | -                                                          |
| Snomax                                                        | Custom-made atomizer                                 | INUIT05_22                           | <i>Wex et al.</i> , 2015                                   |
| PF CGina bacteria                                             | Custom-made atomizer                                 | FIN01_38                             | -                                                          |
| H <sub>2</sub> O                                              | Home-built nozzle spray                              | INUIT05_59                           | -                                                          |
| Ethiopia volcanic soil (VSE01)*                               | Rotating brush (Palas, RGB1000)                      | FIN01_18                             | -                                                          |
| Illite NX                                                     | Rotating brush (Palas, RGB1000)                      | FIN01_4-8, 28-29                     | <i>Hiranuma et al.</i> , 2015                              |
| Argentinian soil dust                                         | Rotating brush (Palas, RGB1000)                      | FIN01_49                             | <i>Steinke</i> . 2013                                      |
| K-rich Feldspar (FS01: microcline 76%, albite 24%)            | Rotating brush (Palas, RGB1000)                      | FIN01_11-15, 29, 31, 33              | <i>Peckhouse et al.</i> , 2016                             |
| K-rich Feldspar (FS04: microcline 80%, albite 18%, quartz 2%) | Rotating brush (Palas, RGB1000)                      | FIN01_46, 50-51, 53, 55              | -                                                          |
| H <sub>2</sub> SO <sub>4</sub>                                | In situ <sup>†</sup>                                 | FIN01_27, 31, 33                     | -                                                          |
| SOA                                                           | In situ <sup>‡</sup>                                 | FIN01_46, 51, 53, 55                 | <i>Saathoff et al.</i> 2009                                |
| Hematite                                                      | Small-Scale Powder Disperser (SSPD; TSI, Model 3433) | INUIT05_1-13                         | <i>Hiranuma et al.</i> , 2014                              |
| Soot (organic carbon content ~10%)                            | Graphite Spark Generator (GfG-1000)                  | FIN01_21, 38, 41; INUIT05_37, 63, 64 | <i>Möhler et al.</i> , 2005b; <i>Helsper et al.</i> , 1993 |
| Soot (organic carbon content between 16 and 40%)              | CAST (Combustion Aerosol Standard) burner            | FIN01_27                             | <i>Möhler et al.</i> , 2005a                               |

<sup>‡</sup>Contact: Institute for Biological Interfaces, KIT, Kersten Rabe

\*63 µm sieved. XRD data is available upon request.

<sup>†</sup>H<sub>2</sub>SO<sub>4</sub> was produced through in situ formation from SO<sub>2</sub> + OH reaction (nucleation and condensation growth). Ozone concentration was typically 900 ppb. Continuous addition of trimethylolethane created OH radical concentrations in the range 10<sup>6</sup>-10<sup>7</sup> cm<sup>-3</sup>, which then oxidized SO<sub>2</sub> to H<sub>2</sub>SO<sub>4</sub>.

<sup>‡</sup>α-pinene SOA was produced via in situ formation from ozonolysis of α-pinene (nucleation and condensation growth). Ozone concentration was in the range of 150-250 ppb.

**Table S2.** Characterization of IS-PCVI properties during the AIDA expansion experiments. The critical cut-size [ $\pm$  standard deviation (Std. dev.)] of droplets and ice crystals are reflected in Fig. 8 and Fig. 9, respectively.

| Experiment ID | Reference time (CET) | Aerosol type                                               | Activation type | PCVI properties |          |                |                                            |           |
|---------------|----------------------|------------------------------------------------------------|-----------------|-----------------|----------|----------------|--------------------------------------------|-----------|
|               |                      |                                                            |                 | IF (lpm)        | CF (lpm) | CF-to-IF ratio | Critical cut-size, $D_c$ ( $\mu\text{m}$ ) | Std. dev. |
| INUIT05_22_c  | 5/21/2013 15:02:07   | Snomax                                                     | Droplet         | 100.0           | 9.0      | 0.09           | 10.86                                      | 0.80      |
| INUIT05_22_d  | 5/21/2013 15:03:13   | Snomax                                                     | Droplet         | 100.0           | 12.0     | 0.12           | 12.60                                      | 0.65      |
| INUIT05_22_f  | 5/21/2013 15:05:45   | Snomax                                                     | Droplet         | 100.0           | 12.0     | 0.12           | 13.38                                      | 1.13      |
| INUIT05_29    | 5/22/2013 15:13:00   | (NH <sub>4</sub> ) <sub>2</sub> SO <sub>4</sub>            | Droplet         | 70.0            | 7.0      | 0.10           | 15.32                                      | 1.85      |
| INUIT05_30    | 5/22/2013 16:06:00   | (NH <sub>4</sub> ) <sub>2</sub> SO <sub>4</sub>            | Droplet         | 70.0            | 9.0      | 0.13           | 17.40                                      | 2.81      |
| INUIT05_31    | 5/22/2013 16:56:01   | (NH <sub>4</sub> ) <sub>2</sub> SO <sub>4</sub>            | Droplet         | 70.0            | 6.0      | 0.09           | 13.08                                      | 1.68      |
| INUIT05_32    | 5/23/2013 10:12:00   | (NH <sub>4</sub> ) <sub>2</sub> SO <sub>4</sub>            | Droplet         | 70.0            | 9.0      | 0.13           | 19.86                                      | 3.15      |
| INUIT05_33    | 5/23/2013 11:19:00   | (NH <sub>4</sub> ) <sub>2</sub> SO <sub>4</sub>            | Droplet         | 70.0            | 9.0      | 0.13           | 20.13                                      | 3.30      |
| INUIT05_34    | 5/23/2013 12:28:00   | (NH <sub>4</sub> ) <sub>2</sub> SO <sub>4</sub>            | Droplet         | 69.0            | 9.0      | 0.13           | 21.50                                      | 3.91      |
| INUIT05_35    | 5/23/2013 13:28:00   | (NH <sub>4</sub> ) <sub>2</sub> SO <sub>4</sub>            | Droplet         | 70.0            | 9.0      | 0.13           | 17.57                                      | 2.66      |
| INUIT05_36    | 5/23/2013 14:20:00   | (NH <sub>4</sub> ) <sub>2</sub> SO <sub>4</sub>            | Droplet         | 70.0            | 9.0      | 0.13           | 17.46                                      | 2.65      |
| INUIT05_37    | 5/23/2013 15:51:00   | (NH <sub>4</sub> ) <sub>2</sub> SO <sub>4</sub> + GSG soot | Droplet         | 70.0            | 9.0      | 0.13           | 16.84                                      | 2.17      |
| INUIT05_60_b  | 6/10/2013 9:45:29    | NaCl                                                       | Droplet         | 100.0           | 9.0      | 0.09           | 10.78                                      | 0.77      |
| INUIT05_61_b  | 6/10/2013 11:13:00   | NaCl                                                       | Droplet         | 50.0            | 9.0      | 0.18           | 24.72                                      | 2.16      |
| INUIT05_61_c  | 6/10/2013 11:15:00   | NaCl                                                       | Droplet         | 50.0            | 7.0      | 0.14           | 21.99                                      | 1.20      |
| INUIT05_61_d  | 6/10/2013 11:17:01   | NaCl                                                       | Droplet         | 50.0            | 6.0      | 0.12           | 22.10                                      | 0.80      |
| INUIT05_61_g  | 6/10/2013 11:23:02   | NaCl                                                       | Droplet         | 50.0            | 7.0      | 0.14           | 20.81                                      | 1.82      |
| INUIT05_62_b  | 6/10/2013 12:30:30   | NaCl                                                       | Droplet         | 70.0            | 10.5     | 0.15           | 24.28                                      | 1.31      |
| INUIT05_62_e  | 6/10/2013 12:36:00   | NaCl                                                       | Droplet         | 70.0            | 12.0     | 0.17           | 27.29                                      | 3.76      |
| INUIT05_63    | 6/10/2013 14:54:00   | NaCl + GSG soot                                            | Droplet         | 70.0            | 9.0      | 0.13           | 17.67                                      | 2.70      |
| INUIT05_64_a  | 6/10/2013 16:17:00   | NaCl + GSG soot                                            | Droplet         | 100.0           | 10.0     | 0.10           | 12.59                                      | N/A       |
| INUIT05_64_c  | 6/10/2013 16:23:00   | NaCl + GSG soot                                            | Droplet         | 100.0           | 12.0     | 0.12           | 16.19                                      | 1.45      |
| FIN01_4       | 11/6/2014 15:30:00   | Illite NX                                                  | Immersion       | 70.0            | 9.5      | 0.14           | 23.77                                      | 2.99      |
| FIN01_5       | 11/6/2014 17:44:00   | Illite NX                                                  | Immersion       | 70.0            | 11.0     | 0.16           | 22.96                                      | 6.56      |
| FIN01_6       | 11/6/2014 18:54:00   | Illite NX                                                  | Immersion       | 70.0            | 11.5     | 0.16           | 27.02                                      | 3.74      |
| FIN01_7       | 11/7/2014 12:23:00   | Illite NX                                                  | Immersion       | 70.0            | 11.5     | 0.16           | 29.80                                      | 6.82      |
| FIN01_8       | 11/7/2014 16:05:00   | Illite NX                                                  | Immersion       | 71.2            | 12.7     | 0.18           | 30.38                                      | 5.22      |
| FIN01_10      | 11/8/2014 12:08:00   | K-rich feldspar (FS01)                                     | Immersion       | 70.0            | 11.0     | 0.16           | 29.72                                      | 2.60      |
| FIN01_11      | 11/8/2014 13:50:00   | FS01                                                       | Immersion       | 70.0            | 9.0      | 0.13           | 23.21                                      | 1.66      |
| FIN01_12_a    | 11/8/2014 15:58:00   | FS01                                                       | Immersion       | 85.0            | 9.0      | 0.11           | 22.22                                      | 2.61      |
| FIN01_12_d    | 11/8/2014 16:03:00   | FS01                                                       | Immersion       | 85.0            | 8.0      | 0.09           | 20.10                                      | 0.91      |
| FIN01_12_e    | 11/8/2014 16:04:00   | FS01                                                       | Immersion       | 85.0            | 9.0      | 0.11           | 22.27                                      | 1.71      |
| FIN01_13_a    | 11/8/2014 17:49:00   | FS01                                                       | Immersion       | 50.0            | 6.5      | 0.13           | 24.93                                      | 1.84      |
| FIN01_13_b    | 11/8/2014 17:53:00   | FS01                                                       | Immersion       | 50.0            | 5.5      | 0.11           | 21.95                                      | 1.63      |
| FIN01_13_c    | 11/8/2014 17:54:00   | FS01                                                       | Immersion       | 50.0            | 5.0      | 0.10           | 21.58                                      | 3.24      |

|            |                     |                                                         |            |       |      |      |       |       |
|------------|---------------------|---------------------------------------------------------|------------|-------|------|------|-------|-------|
| FIN01_14_a | 11/10/2014 10:24:00 | FS01                                                    | Immersion  | 85.0  | 12.0 | 0.14 | 23.10 | 3.58  |
| FIN01_14_b | 11/10/2014 10:26:20 | FS01                                                    | Immersion  | 85.0  | 8.0  | 0.09 | 17.67 | 0.78  |
| FIN01_14_c | 11/10/2014 10:29:25 | FS01                                                    | Immersion  | 85.0  | 12.0 | 0.14 | 25.33 | 1.66  |
| FIN01_15_a | 11/10/2014 11:57:00 | FS01                                                    | Immersion  | 85.0  | 12.0 | 0.14 | 25.95 | 2.73  |
| FIN01_15_b | 11/10/2014 12:01:00 | FS01                                                    | Immersion  | 85.0  | 8.0  | 0.09 | 19.56 | 4.30  |
| FIN01_15_c | 11/10/2014 12:08:10 | FS01                                                    | Immersion  | 85.0  | 12.0 | 0.14 | 24.36 | 10.54 |
| FIN01_18_a | 11/11/2014 11:11:11 | Ethiopia<br>volcanic soil<br>(VSE01)                    | Immersion  | 75.0  | 11.5 | 0.15 | 27.22 | 3.96  |
| FIN01_18_b | 11/11/2014 11:16:10 | VSE01                                                   | Immersion  | 75.0  | 9.0  | 0.12 | 26.26 | 4.03  |
| FIN01_19_b | 11/11/2014 12:38:15 | VSE01                                                   | Immersion  | 75.0  | 9.0  | 0.12 | 26.72 | 3.80  |
| FIN01_21_a | 11/12/2014 10:31:00 | GSG soot                                                | Deposition | 75.0  | 11.5 | 0.15 | 27.70 | 5.98  |
| FIN01_21_b | 11/12/2014 10:36:00 | GSG soot                                                | Deposition | 75.0  | 9.0  | 0.12 | 21.21 | 3.71  |
| FIN01_25_b | 11/13/2014 12:31:45 | H <sub>2</sub> SO <sub>4</sub>                          | Deposition | 75.0  | 9.0  | 0.12 | 24.61 | 3.97  |
| FIN01_27_b | 11/13/2014 18:22:10 | H <sub>2</sub> SO <sub>4</sub> +<br>CAST soot           | Deposition | 85.0  | 8.5  | 0.10 | 23.12 | 4.45  |
| FIN01_28_b | 11/14/2014 11:04:20 | Illite NX                                               | Deposition | 85.0  | 8.0  | 0.09 | 16.13 | 1.11  |
| FIN01_28_d | 11/14/2014 11:16:30 | Illite NX                                               | Deposition | 85.0  | 8.0  | 0.09 | 19.17 | 4.93  |
| FIN01_29_a | 11/14/2014 16:19:00 | Illite NX +<br>FS01                                     | Deposition | 85.0  | 9.0  | 0.11 | 20.74 | 6.81  |
| FIN01_29_b | 11/14/2014 16:21:30 | Illite NX +<br>FS01                                     | Deposition | 85.0  | 7.5  | 0.09 | 17.42 | 2.78  |
| FIN01_29_e | 11/14/2014 16:27:10 | Illite NX +<br>FS01                                     | Deposition | 105.0 | 9.0  | 0.09 | 14.14 | 1.46  |
| FIN01_31_b | 11/15/2014 17:30:50 | FS01 + H <sub>2</sub> SO <sub>4</sub>                   | Deposition | 80.0  | 8.0  | 0.10 | 15.63 | 2.51  |
| FIN01_31_c | 11/15/2014 17:31:30 | FS01 + H <sub>2</sub> SO <sub>4</sub>                   | Deposition | 90.0  | 8.0  | 0.09 | 14.59 | 7.44  |
| FIN01_31_d | 11/15/2014 17:33:20 | FS01 + H <sub>2</sub> SO <sub>4</sub>                   | Deposition | 85.0  | 8.0  | 0.09 | 22.37 | 1.28  |
| FIN01_31_e | 11/15/2014 17:34:20 | FS01 + H <sub>2</sub> SO <sub>4</sub>                   | Deposition | 85.0  | 7.5  | 0.09 | 16.35 | 4.81  |
| FIN01_33_b | 11/17/2014 17:27:30 | FS01 + H <sub>2</sub> SO <sub>4</sub>                   | Immersion  | 90.0  | 16.0 | 0.18 | 25.03 | 2.77  |
| FIN01_33_c | 11/17/2014 17:28:45 | FS01 + H <sub>2</sub> SO <sub>4</sub>                   | Immersion  | 90.0  | 12.0 | 0.13 | 20.10 | 2.03  |
| FIN01_33_d | 11/17/2014 17:29:37 | FS01 + H <sub>2</sub> SO <sub>4</sub>                   | Immersion  | 90.0  | 10.0 | 0.11 | 15.64 | 4.94  |
| FIN01_33_f | 11/17/2014 17:31:45 | FS01 + H <sub>2</sub> SO <sub>4</sub>                   | Immersion  | 90.0  | 10.0 | 0.11 | 15.64 | 7.54  |
| FIN01_46   | 11/20/2014 17:13:00 | K-rich<br>Feldspar<br>(FS04) + $\alpha$ -<br>pinene SOA | Immersion  | 90.0  | 15.0 | 0.17 | 24.96 | 4.77  |
| FIN01_49   | 11/22/2014 13:54:00 | Argentinian<br>soil dust                                | Immersion  | 90.0  | 14.0 | 0.16 | 23.11 | 6.55  |
| FIN01_50_c | 11/24/2014 11:07:30 | FS04                                                    | Deposition | 80.0  | 8.0  | 0.10 | 16.03 | 2.05  |
| FIN01_50_d | 11/24/2014 11:08:30 | FS04                                                    | Deposition | 80.0  | 10.0 | 0.13 | 22.37 | 3.87  |
| FIN01_51_b | 11/24/2014 15:52:00 | FS04 + $\alpha$ -<br>pinene SOA                         | Deposition | 80.0  | 8.0  | 0.10 | 21.34 | 5.98  |
| FIN01_53   | 11/25/2014 12:30:00 | FS04 + $\alpha$ -<br>pinene SOA                         | Deposition | 80.0  | 10.0 | 0.13 | 27.05 | 2.78  |
| FIN01_55_b | 11/25/2014 16:58:00 | FS04 + $\alpha$ -<br>pinene SOA                         | Deposition | 75.0  | 10.0 | 0.13 | 26.84 | 3.52  |

## References

- Helsper, C., Molter, W., Löffler, F., Wadenpohl, C., and Kaufmann, S.: Investigation of a new aerosol generator for the production of carbon aggregate particles, *Atmos. Environ.*, 27A, 1271–1275, doi:10.1016/0960-1686(93)90254-V, 1993.
- 5 Hiranuma, N., Hoffmann, N., Kiselev, A., Dreyer, A., Zhang, K., Kulkarni, G., Koop, T., and Möhler, O.: Influence of surface morphology on the immersion mode ice nucleation efficiency of hematite particles, *Atmos. Chem. Phys.*, 14, 2315–2324, doi:10.5194/acp-14-2315-2014, 2014.
- Hiranuma, N., Augustin-Bauditz, S., Bingemer, H., Budke, C., Curtius, J., Danielczok, A., Diehl, K., Dreischmeier, K., Ebert, M., Frank, F., Hoffmann, N., Kandler, K., Kiselev, A., Koop, T., Leisner, T., Möhler, O., Nillius, B., Peckhaus, A., Rose, D., Weinbruch, S., Wex, H., Boose, Y., DeMott, P. J., Hader, J. D., Hill, T. C. J., Kanji, Z. A., Kulkarni, G., Levin, E. J. T., McCluskey, C. S., Murakami, M., Murray, B. J., Niedermeier, D., Petters, M. D., O'Sullivan, D., Saito, A., Schill, G. P., Tajiri, T., Tolbert, M. A., Welti, A., Whale, T. F., Wright, T. P., and Yamashita, K.: A comprehensive laboratory study on the immersion freezing behavior of illite NX particles: a comparison of 17 ice nucleation measurement techniques, *Atmos. Chem. Phys.*, 15, 2489–2518, doi:10.5194/acp-15-2489-2015, 2015.
- 10 Möhler, O., Linke, C., Saathoff, H., Schnaiter, M., Wagner, R., Mangold, A., Kramer, M., and Schurath, U.: Ice nucleation on flame soot aerosol of different organic carbon content, *Meteorol. Z.*, 14, 477–484, doi: 10.1127/0941-2948/2005/0055, 2005a.
- 20 Möhler, O., Büttner, S., Linke, C., Schnaiter, M., Saathoff, H., Stetzer, O., Wagner, R., Kramer, M., Mangold, A., Ebert, V., and Schurath, U.: Effect of sulphuric acid coating on heterogeneous ice nucleation by soot aerosol particles, *J. Geophys. Res.*, 110, D11 210, doi:10.1029/2004JD005 169, 2005b.
- 25 Peckhaus, A., Kiselev, A., Hiron, T., Ebert, M., and Leisner, T.: A comparative study of K-rich and Na/Ca-rich feldspar ice nucleating particles in a nanoliter droplet freezing assay, *Atmos. Chem. Phys. Discuss.*, doi:10.5194/acp-2016-72, 2016.
- Saathoff, H., Naumann, K.-H., Möhler, O., Jonsson, Å. M., Hallquist, M., Kiendler-Scharr, A., Mentel, Th. F., Tillmann, R., and Schurath, U.: Temperature dependence of yields of secondary organic aerosols from the ozonolysis of  $\alpha$ -pinene and limonene, *Atmos. Chem. Phys.*, 9, 1551–1577, doi:10.5194/acp-9-1551-2009, 2009.
- 30 Steinke, I.: Ice nucleation properties of mineral dusts. PhD thesis, Karlsruhe Institute of Technology, Karlsruhe, Germany, 160 pp., 2013.
- 35 Wex, H., Augustin-Bauditz, S., Boose, Y., Budke, C., Curtius, J., Diehl, K., Dreyer, A., Frank, F., Hartmann, S., Hiranuma, N., Jantsch, E., Kanji, Z. A., Kiselev, A., Koop, T., Möhler, O., Niedermeier, D., Nillius, B., Rösch, M., Rose, D., Schmidt, C., Steinke, I., and Stratmann, F.: Intercomparing different devices for the investigation of ice nucleating particles using Snomax® as test substance, *Atmos. Chem. Phys.*, 15, 1463–1485, doi:10.5194/acp-15-1463-2015, 2015.
